# Supplementary material
Source: PubMed Central journal article supplement (PMC3608091)
Supplement: Supp_Fig1.pdf [file Supp_Fig1.pdf]

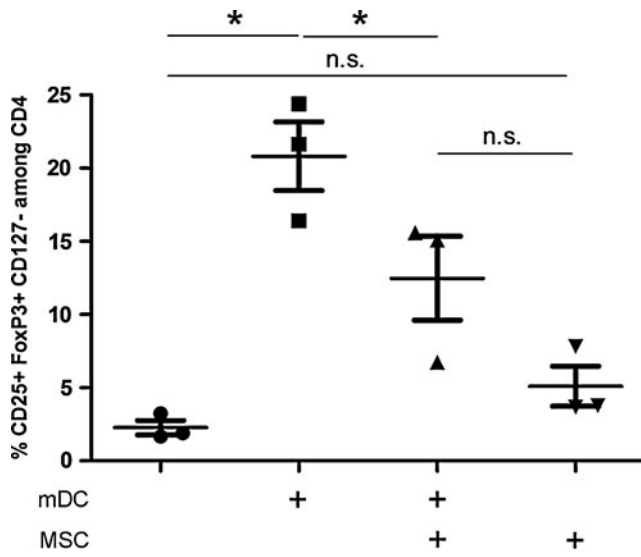

**SUPPLEMENTARY FIG. S1.** Mesenchymal stromal cells (MSCs) do not increase the percentage of Tregs in purified CD4<sup>+</sup> T-cells stimulated by allogeneic mature dendritic cells (mDCs). CD4<sup>+</sup> T-cells were isolated from fresh peripheral blood mononuclear cells and stimulated or not in the presence or absence of MSCs ( $n=3$ ).  $*p \leq 0.05$ , paired  $t$ -test. n.s., non significant.
