# Supplementary material
Source: PubMed Central journal article supplement (PMC3608091)
Supplement: Supp_Fig2.pdf [file Supp_Fig2.pdf]

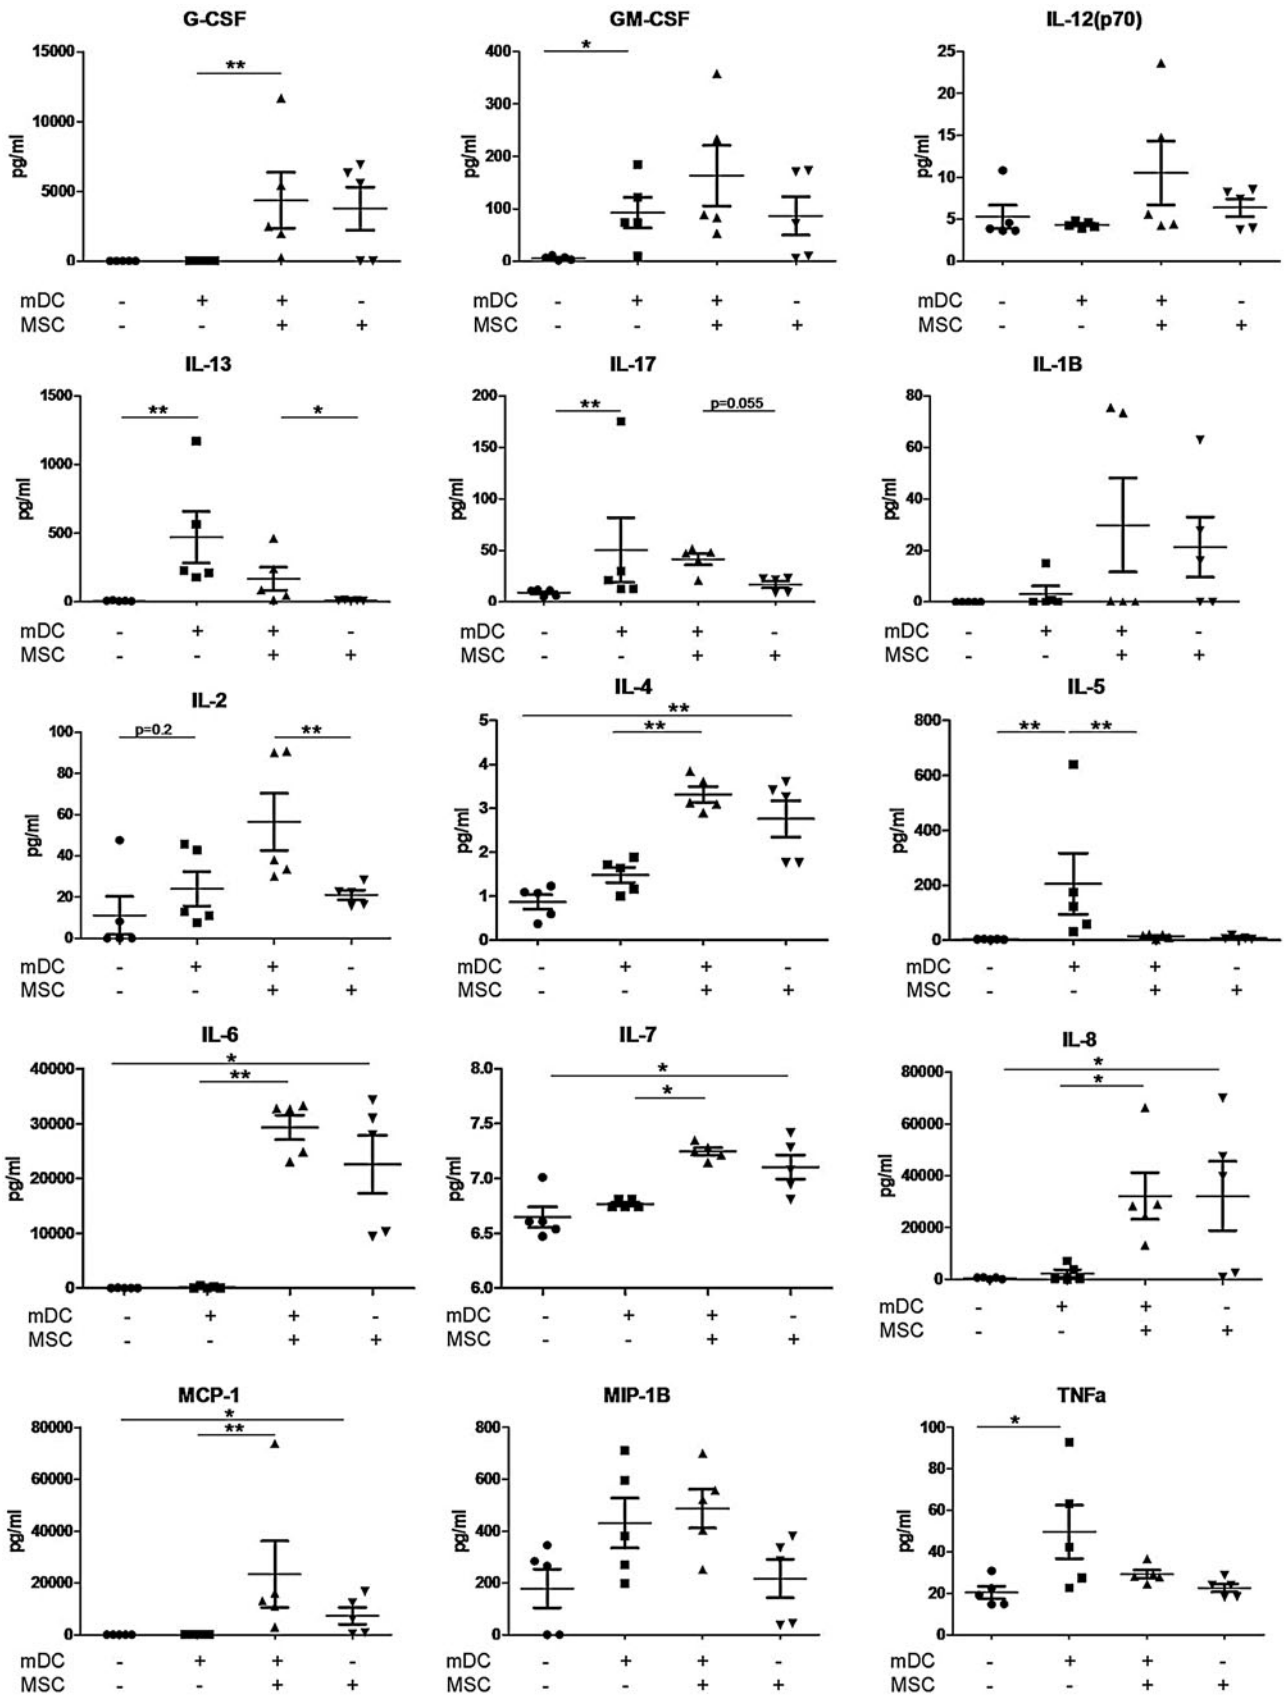

**SUPPLEMENTARY FIG. S2.** Analysis of secreted cytokines in different culture conditions. Supernatant was collected from the different conditions in which CD4<sup>+</sup> T-cells were cultured for 6 days, and cytokine analysis was performed (*n*=5). \**p*≤0.05, \*\**p*≤0.005, and \*\*\**p*≤0.001. Mann-Whitney test, 2-tailed.
