# Supplementary material
Source: PubMed Central journal article supplement (PMC3608091)
Supplement: Supp_Fig3.pdf [file Supp_Fig3.pdf]

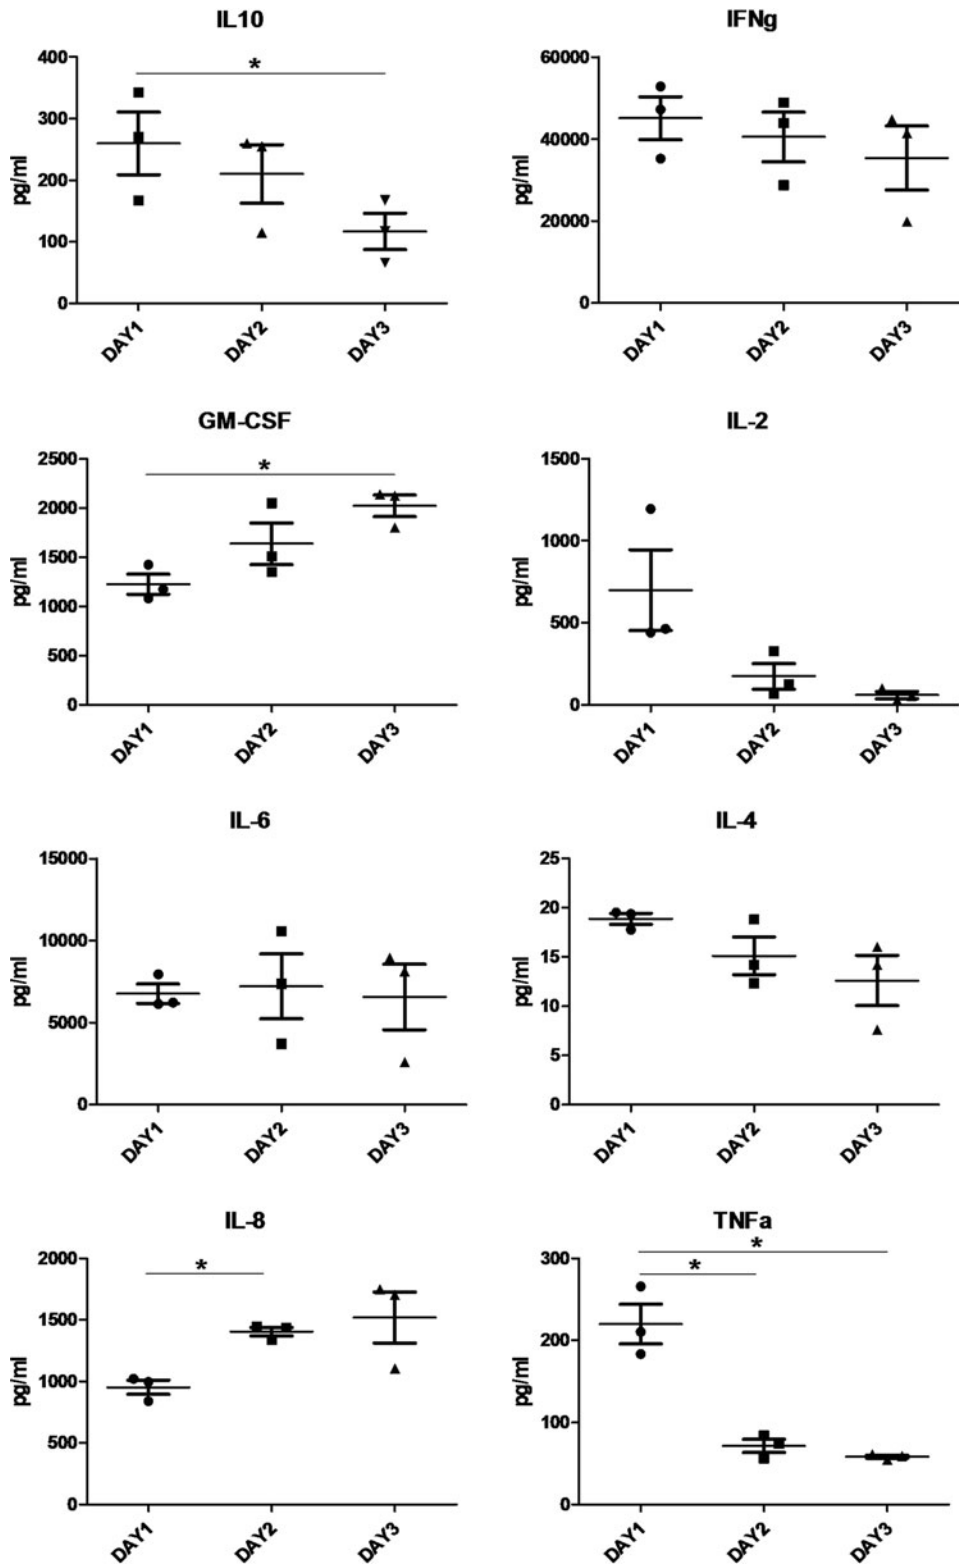

**SUPPLEMENTARY FIG. S3.** Analysis of secreted cytokines from restimulated cells obtained from different culture conditions. CD4<sup>+</sup> T-cells were cultured for 6 days with allogeneic DCs, in the presence of MSCs. On day 6, cells were harvested and CD4<sup>+</sup> T-cells were restimulated for 1, 2, and 3 days with allogeneic DCs (same donor as in the first MLR, same ratio of CD4<sup>+</sup> T-cells:DCs). Supernatants were collected and cytokines tested using a Luminex assay (8-plex; by Bio-Rad Laboratories). Results are showed as pg/mL cytokine concentration at the different time points.
