# Supplementary material
Source: PubMed Central journal article supplement (PMC3608091)
Supplement: Supp_Fig4.pdf [file Supp_Fig4.pdf]

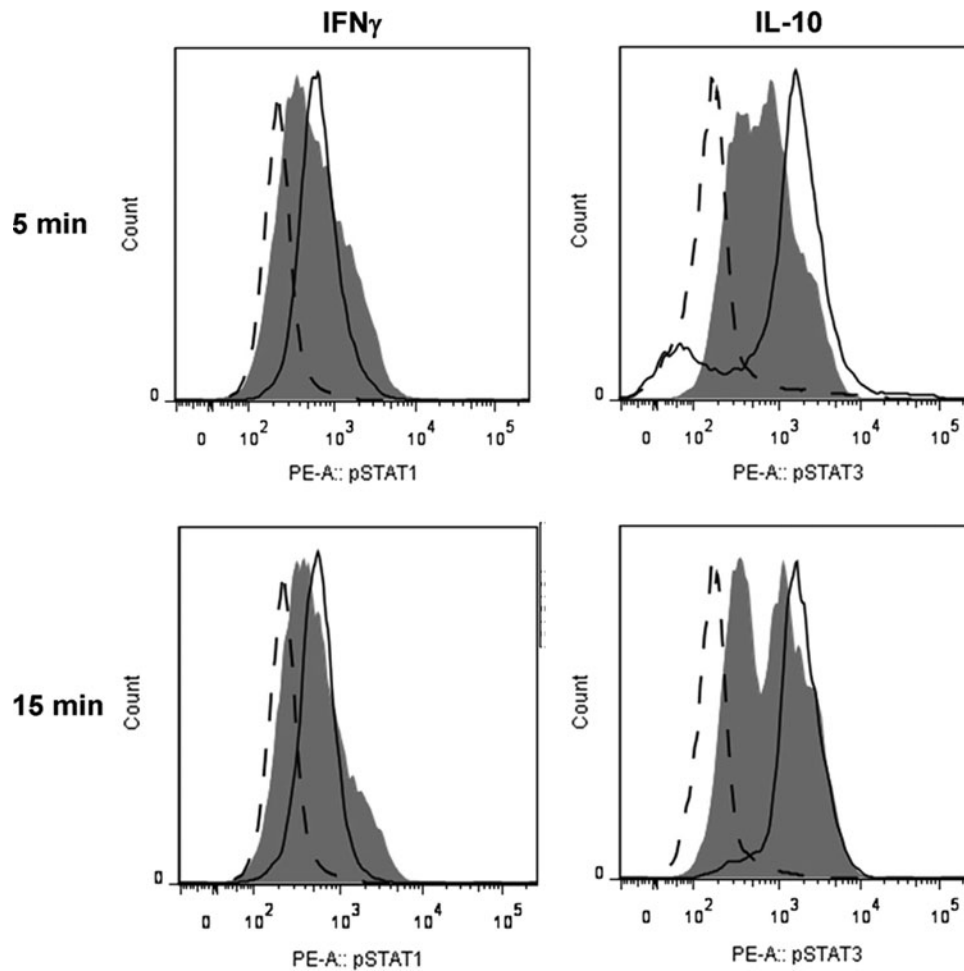

**SUPPLEMENTARY FIG. S4.** Cells stimulated in the presence of MSCs show an altered STAT-phosphorylation profile in response to IFN $\gamma$  and IL-10. After 6 days of stimulation with allogeneic DCs in the presence or absence of MSCs, CD4<sup>+</sup> T-cells were harvested and stimulated with 50 ng/mL of IFN $\gamma$  or IL-10 for 5, 15, and 30 min, and STAT1 and STAT3 phosphorylation was measured by flow cytometry, respectively. We show here the phosphorylation of STAT1 and STAT3, 5 and 15 min after stimulation by IFN $\gamma$  and IL-10, respectively. After 30 min, the phosphorylation of both STAT1 and STAT3 was decreased (data not shown). *Dashed lines*: STAT phosphorylation of nonstimulated resting cells; *gray-filled histogram*: CD4<sup>+</sup> T-cells previously cultured in the presence of allogeneic DCs and MSCs, and then stimulated; *black line*: CD4<sup>+</sup> T-cells previously cultured in the presence of allogeneic DCs, and then stimulated. Data shown here are from a representative experiment. A total of 3 donors were tested.
