# Supplementary material
Source: PubMed Central journal article supplement (PMC3608091)
Supplement: Supp_Fig5.pdf [file Supp_Fig5.pdf]

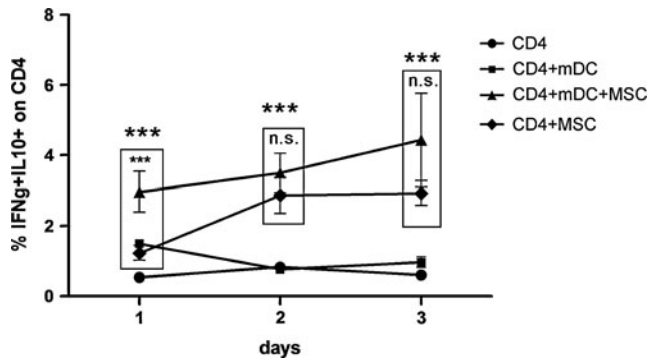

**SUPPLEMENTARY FIG. S5.** IFN $\gamma$ <sup>+</sup> IL-10<sup>+</sup> T-cells expand upon restimulation. CD4<sup>+</sup> T-cells were harvested after 6 days of coculture with or without allogeneic mDCs, in the presence or absence of MSCs. Cells were restimulated with allogeneic mDCs (same source as during the first stimulation), and the percentage of double-positive cells among CD4<sup>+</sup> T-cells was assessed by flow cytometry. The legend shows the conditions used during the first MLR from which CD4<sup>+</sup> T-cells were isolated. Three donors were tested. Statistics: one-way analysis of variance (ANOVA) test was applied to compare the 4 culture conditions in the first MLR from which CD4<sup>+</sup> T-cells were isolated. The statistics in the boxes refers to a paired *t*-test between data obtained from cells isolated from the following conditions: CD4<sup>+</sup> T-cells + mDCs + MSCs and CD4<sup>+</sup> T-cells + MSCs. n.s., non significant. \*\*\* $p \leq 0.0005$ .
