# Supplementary material
Source: PubMed Central journal article supplement (PMC3608091)
Supplement: Supp_Fig6.pdf [file Supp_Fig6.pdf]

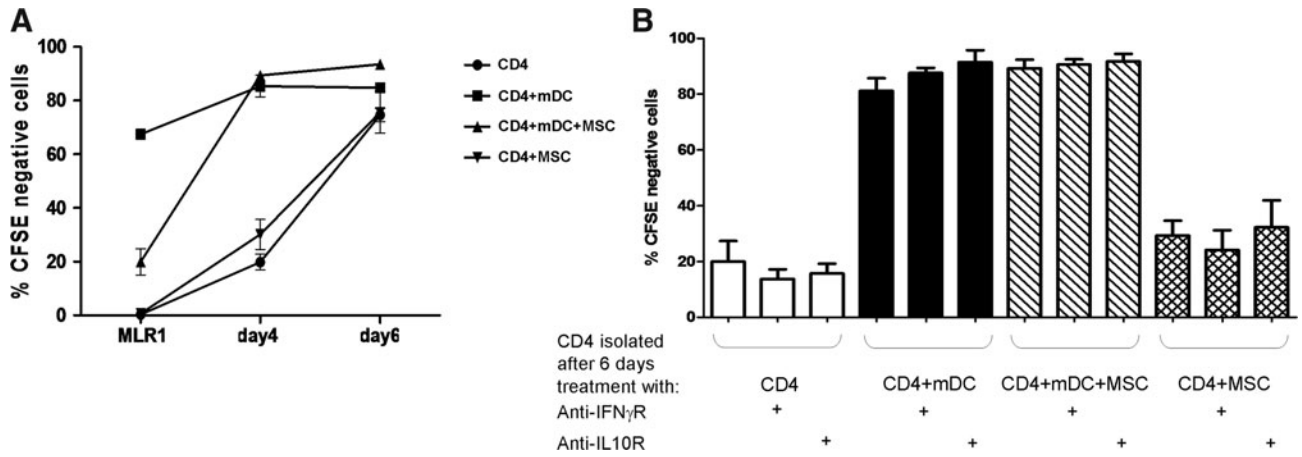

**SUPPLEMENTARY FIG. S6.** Cells treated with MSCs can proliferate upon isolation and restimulation with allogeneic DCs. (A) CD4<sup>+</sup> T-cells were cultured for 6 days in the presence or not of allogeneic DCs, in presence or not of MSCs. In the first column (first stimulation), the percentage of proliferating cells at the end of day 6 is reported for the different conditions. On day 6, CD4<sup>+</sup> T-cells were harvested, stained with CFSE, and restimulated for 4–6 days with allogeneic DCs (same donor as in the first stimulation). (B) In the same experimental setting as in *panel (A)*, cells were treated with either IFN $\gamma$ - or IL-10-blocking antibodies during the first stimulation: the treatment did not influence their ability to proliferate in a second stimulation. (A) Three donors were tested; (B) 2 donors were tested.
