# Supplementary material
Source: PubMed Central journal article supplement (PMC3608091)
Supplement: Supp_Fig7.pdf [file Supp_Fig7.pdf]

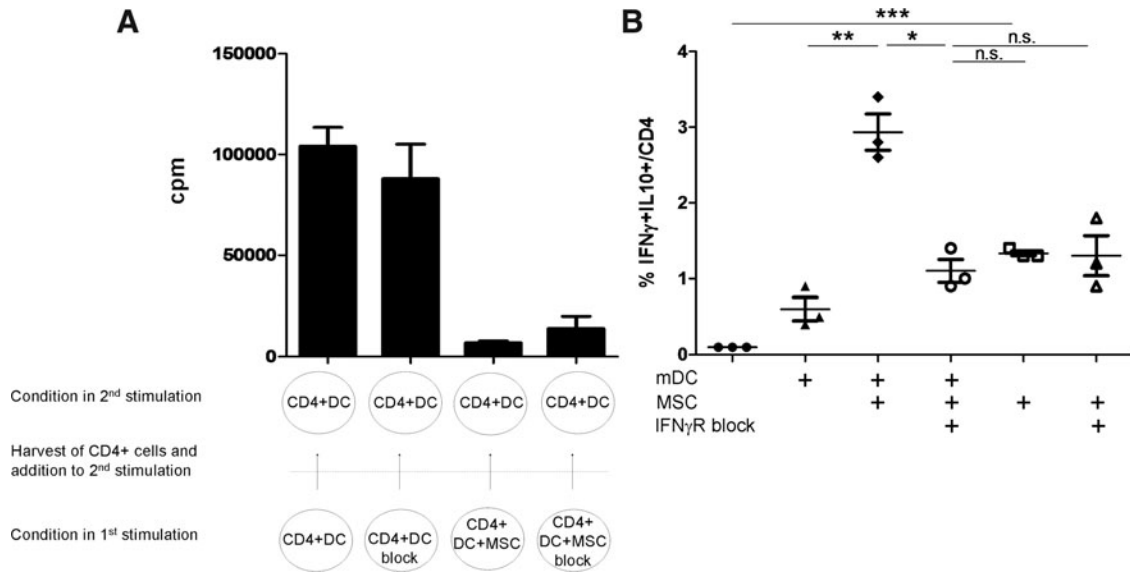

**SUPPLEMENTARY FIG. S7.** Upon blocking the IFN $\gamma$ R, cells do not lose their immunomodulatory activity. **(A)** CD4<sup>+</sup> T-cells were cultured for 6 days in different conditions (stimulated by allogeneic DCs in the presence or not of MSCs) with or without the IFN $\gamma$ R-blocking antibody. On day 6, CD4<sup>+</sup> T-cells were harvested and transferred to a second MLR where freshly derived autologous CD4<sup>+</sup> T-cells were stimulated by allogeneic DCs (same donor as in the first MLR). Three days after cell transfer, [<sup>3</sup>H]-thymidine was added to the wells and incubated for 24 h. Data are shown as absolute cpm counts (average of a biological triplicate). Two donors were tested. **(B)** CD4<sup>+</sup> T-cells were cultured for 6 days in different conditions (in the presence or not of allogeneic DCs, treated or not with MSCs), and the percentage of IFN $\gamma$ <sup>+</sup> IL-10<sup>+</sup> cells among the CD4<sup>+</sup> T-cells was assessed by flow cytometry. \* $p \leq 0.05$ , \*\* $p \leq 0.005$ , and \*\*\* $p \leq 0.001$ , paired  $t$ -test. n.s., non significant.
