# Supplementary material
Source: PubMed Central journal article supplement (PMC3608091)
Supplement: Supp_Fig8.pdf [file Supp_Fig8.pdf]

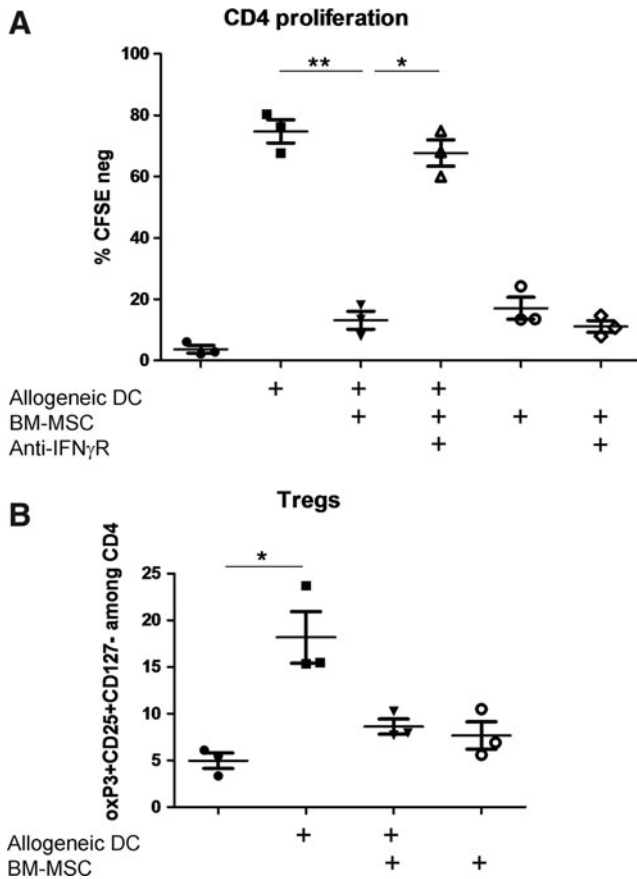

**SUPPLEMENTARY FIG. S8.** Freshly obtained bone-marrow-derived MSCs share immunomodulatory properties with immortalized cord blood-derived MSCs. **(A)** Bone-marrow-derived MSCs inhibit allogeneic CD4<sup>+</sup> T-cell proliferation by a mechanism that can be reversed by the presence of an antibody neutralizing the activity of the IFN $\gamma$ R. **(B)** The immunomodulatory effect was not accompanied by an increase in T-regulatory cells.  $n=3$  independent experiments. Statistics: paired  $t$ -test, 2-tailed;  $*p \leq 0.05$  and  $**p \leq 0.01$ . MSCs used in this experiment were obtained from human bone marrow based on their adhesive properties and characterized for marker expression as described for cord blood-MSCs in the Materials and Methods section.
