# Supplementary material
Source: PubMed Central journal article supplement (PMC3608091)
Supplement: Supp_Table1.pdf [file Supp_Table1.pdf]

## Supplementary Data

SUPPLEMENTARY TABLE S1. CD4+DC+MSC VERSUS CD4,  
UPREGULATED GENES; IN ITALICS, DOWNREGULATED GENES

| <i>Gene symbol</i> | <i>Fold regulation</i> | <i>p-Value</i>  |
|--------------------|------------------------|-----------------|
| IFNG               | 263.1971               | 0.023471        |
| CD86               | 59.8522                | 0.000536        |
| IL2RA              | 59.1648                | 0.031189        |
| IL1R1              | 42.7149                | 0.008908        |
| SOCS1              | 27.1585                | 0.017624        |
| STAT1              | 25.6342                | 0.000015        |
| CTLA4              | 19.0713                | 0.044881        |
| CCR5               | 18.0009                | 0.023166        |
| IL1R2              | 17.4683                | 0.042791        |
| CCR2               | 15.707                 | 0.022726        |
| IL18R1             | 15.4193                | 0.01076         |
| CD80               | 14.3867                | 0.019676        |
| IL13               | 14.1559                | 0.000097        |
| TNFRSF9            | 13.0261                | 0.000033        |
| IL7                | 11.8488                | 0.000461        |
| TNFSF4             | 10.0561                | 0.041103        |
| TBX21              | 9.736                  | 0.036736        |
| GFI1               | 8.9177                 | 0.043113        |
| FASLG              | 8.2821                 | 0.0255          |
| IRF1               | 8.263                  | 0.011306        |
| ACTB               | 7.9264                 | 0.034711        |
| MAF                | 7.21                   | 0.009912        |
| CEBPB              | 6.9323                 | 0.000318        |
| HPRT1              | 6.9003                 | 0.038839        |
| CCR4               | 6.6962                 | 0.035533        |
| ICOS               | 5.2174                 | 0.035317        |
| SFTPD              | 5.0747                 | 0.022202        |
| JAK2               | 4.3772                 | 0.006542        |
| TMED1              | 4.3369                 | 0.002929        |
| PCGF2              | 4.2575                 | 0.000658        |
| IL15               | 4.2183                 | 0.010812        |
| IL4R               | 3.8906                 | 0.00002         |
| GATA3              | 3.302                  | 0.029613        |
| TLR6               | 3.1821                 | 0.02319         |
| B2M                | 2.9622                 | 0.000426        |
| SOCS2              | 2.7702                 | 0.012333        |
| STAT4              | 2.639                  | 0.00975         |
| NFATC2             | 2.5315                 | 0.033869        |
| TFCP2              | 2.3295                 | 0.010223        |
| SOCS5              | 2.2868                 | 0.000339        |
| NFATC2IP           | 2.2397                 | 0.010217        |
| YY1                | 2.1092                 | 0.011569        |
| NFATC1             | 2.0946                 | 0.00003         |
| TYK2               | 1.7654                 | 0.002376        |
| JAK1               | 1.7573                 | 0.015496        |
| IL23A              | 1.7092                 | 0.017718        |
| PTPRC              | 1.5948                 | 0.010982        |
| <i>IL6R</i>        | <i>-2.6451</i>         | <i>0.018994</i> |
