# Supplementary material
Source: PubMed Central journal article supplement (PMC3608091)
Supplement: Supp_Table2.pdf [file Supp_Table2.pdf]

SUPPLEMENTARY TABLE S2. CD4+MSC VERSUS CD4+DC,  
UPREGULATED GENES; IN ITALICS, DOWNREGULATED GENES

| <i>Gene symbol</i> | <i>Fold regulation</i> | <i>p-Value</i> |
|--------------------|------------------------|----------------|
| CCL7               | 7.4815                 | 0.032941       |
| CEBPB              | 7.2267                 | 0.041402       |
| IL6R               | 4.5211                 | 0.00162        |
| INHA               | 4.1125                 | 0.00763        |
| IL17A              | 3.8906                 | 0.001921       |
| CCL11              | 3.8906                 | 0.001921       |
| HGDC               | 3.8906                 | 0.001921       |
| IL15               | 3.7755                 | 0.008975       |
| IGSF6              | 3.7321                 | 0.030478       |
| CREBBP             | 3.1675                 | 0.019968       |
| IL4                | 3.1456                 | 0.002424       |
| IRF1               | 3.0455                 | 0.002205       |
| MAF                | 2.2449                 | 0.002194       |
| IL18R1             | 2.1238                 | 0.012164       |
| MAP2K7             | 2.042                  | 0.017009       |
| B2M                | 2.0373                 | 0.004804       |
| STAT4              | 1.9453                 | 0.012982       |
| STAT1              | 1.8277                 | 0.006295       |
| IL4R               | 1.815                  | 0.008921       |
| CCR4               | -3.9724                | 0.01256        |
| <i>IRF4</i>        | -3.302                 | 0.041508       |
| <i>GAPDH</i>       | -3.1311                | 0.011183       |
| <i>HAVCR2</i>      | -3.0951                | 0.042747       |
| <i>HPRT1</i>       | -2.5432                | 0.009071       |
| <i>ACTB</i>        | -2.2294                | 0.002235       |
| <i>CD86</i>        | -2.0326                | 0.027678       |
| <i>IL2RA</i>       | -1.7983                | 0.024833       |
| <i>CD40LG</i>      | -1.7492                | 0.033618       |
| <i>ICOS</i>        | -1.7171                | 0.030095       |
| <i>GATA3</i>       | -1.5192                | 0.027503       |
